# Supplementary material
Source: publisher site journal article supplement (https://www.dovepress.com/article/349516)
Supplement: Supplementary file 1 [file get_supplementary_file.php]

**Supplementary Material**


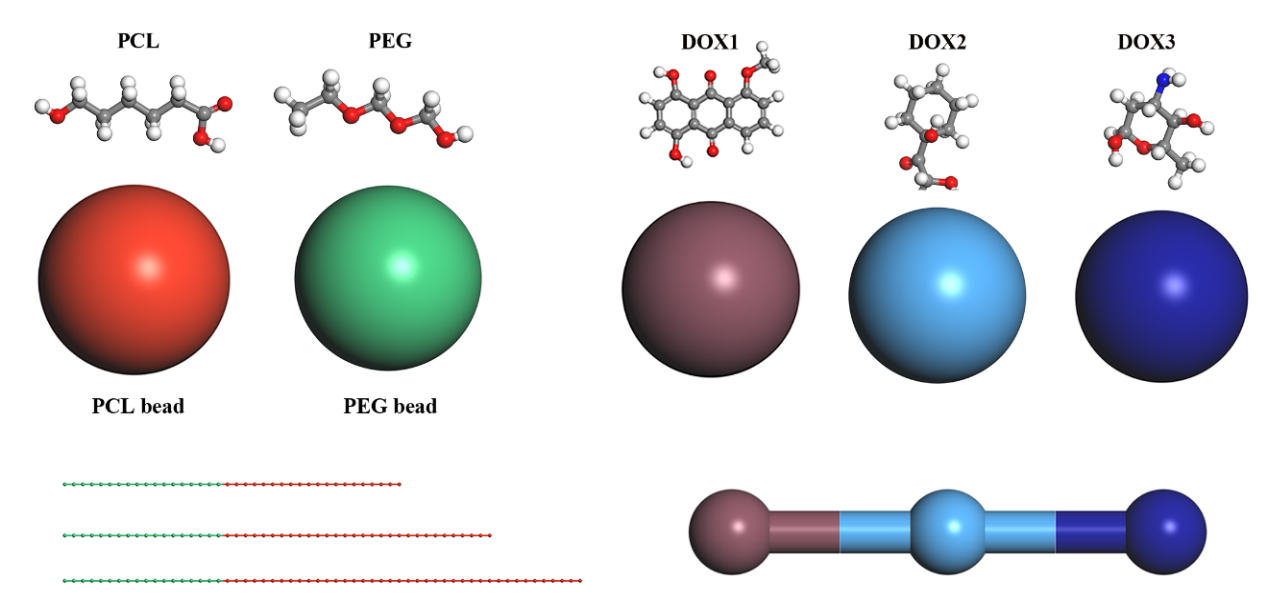


Figure S 1 The schematic diagram of blocks and drug (DOX) of micelles in the DPD simulation. The red bead represents PCL, the green bead represents PEG, and DOX is divided into three beads.

Table S 1 Interaction parameters aij between different beads used in DPD simulations

| aij | PEG | PCL | DOX1 | DOX2 | DOX3 | WATER |
| --- | --- | --- | --- | --- | --- | --- |
| PEG | 25 |  |  |  |  |  |
| PCL | 34.41 | 25 |  |  |  |  |
| DOX1 | 31.14 | 25.42 | 25 |  |  |  |
| DOX2 | 34.22 | 25.03 | 25.26 | 25 |  |  |
| DOX3 | 33.61 | 25.14 | 25.75 | 25.13 | 25 |  |
| WATER | 26.10 | 117.12 | 40.37 | 31.36 | 130.78 | 25 |
